# Supplementary material for: Taste masking of a drug by pH-responsive coordination polymer-coated mesoporous silica nanoparticles
Source: Royal Society of Chemistry journal article supplement (doi:10.1039/c6ra19789b), 2016-01-01
Supplement: c6ra19789b1.pdf [file c6ra19789b1.pdf]

## Supplementary Information

For

### Taste Masking of Drug by pH-Responsive Coordination Polymer Coated Mesoporous Silica Nanoparticles

Guang-Ming Bao,<sup>a</sup> LiQi Wang,<sup>a</sup> Hou-Qun Yuan,<sup>\*b</sup> Xiao-Ying Wang,<sup>a</sup> Tian-Xiao Mei<sup>a</sup> and Ming-Ren Qu<sup>c</sup>

<sup>a</sup>Institute of Veterinary Pharmacy, Department of Veterinary Medicine, School of Animal Science and Technology, Jiangxi Agricultural University, Nanchang 330045, People's Republic of China

<sup>b</sup>Department of Chemistry, School of Sciences, Jiangxi Agricultural University, Nanchang 330045, People's Republic of China

<sup>c</sup>Department of Animal Science, School of Animal Science and Technology, Jiangxi Agricultural University, Nanchang 330045, People's Republic of China

**Table S1. BET and BJH parameters of the MSN-NH<sub>2</sub>, MSNs-NH<sub>2</sub>-MEQ@Fe-bipy**

**Table S2. MIC and MBC value of MSN-NH<sub>2</sub>-MEQ@Fe-bipy and its raw materials (μg·mL<sup>-1</sup>)**

**Table S1. BET and BJH parameters of the MSN-NH<sub>2</sub>, MSNs-NH<sub>2</sub>-MEQ@Fe-bipy**

| Material                          | BET Surface area<br>S <sub>BET</sub> (m <sup>2</sup> /g) | BET Total pore volume<br>V <sub>P</sub> (cm <sup>3</sup> /g) | BJH Pore diameter<br>W <sub>BJH</sub> (nm) |
|-----------------------------------|----------------------------------------------------------|--------------------------------------------------------------|--------------------------------------------|
| MSN-NH <sub>2</sub>               | 871.2911                                                 | 0.799223                                                     | 2.4918                                     |
| MSNs-NH <sub>2</sub> -MEQ@Fe-bipy | 149.4905                                                 | 0.115846                                                     | 2.2122                                     |

**Table S2. MIC and MBC value of MSN-NH<sub>2</sub>-MEQ@Fe-bipy and its raw materials (μg·mL<sup>-1</sup>)**

|     | MSN-MEQ@Fe-<br>bipy | MEQ@MSN-<br>NH <sub>2</sub> | MEQ | Fe-bipy | MSN-NH <sub>2</sub> |
|-----|---------------------|-----------------------------|-----|---------|---------------------|
| MIC | 128                 | 32                          | 8   | -       | -                   |
| MBC | -                   | 128                         | 32  | -       | -                   |
